# Supplementary material
Source: publisher figshare collection journal article supplement (https://geolsoc.figshare.com/articles/dataset/_/3454277)

Mercury Porosimetry M77010H-1

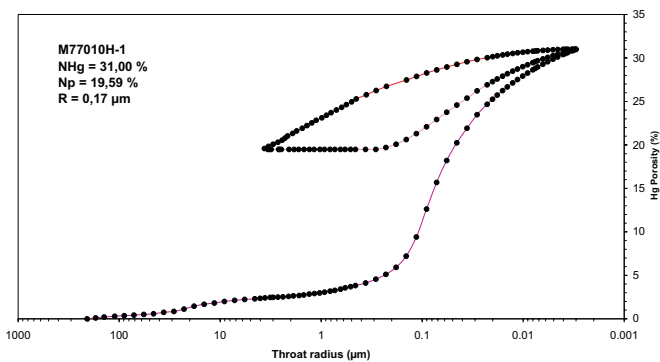

Mercury Porosimetry M77010H-2

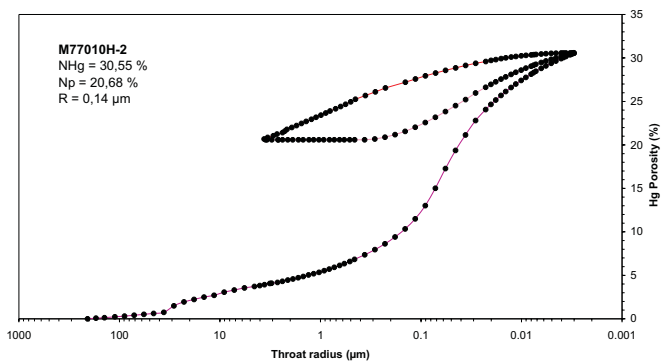

Mercury Porosimetry M77010H-3

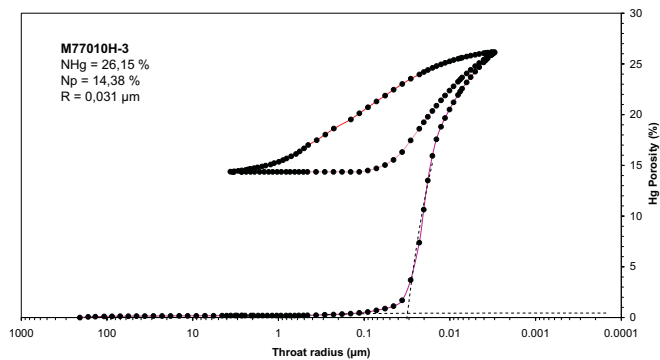

Mercury Porosimetry M77010H-4

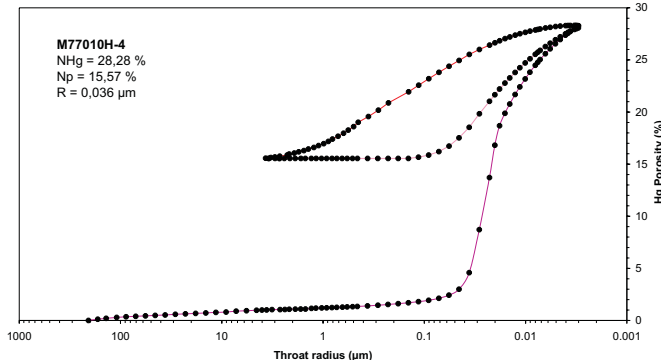

Mercury Porosimetry M77010H-5

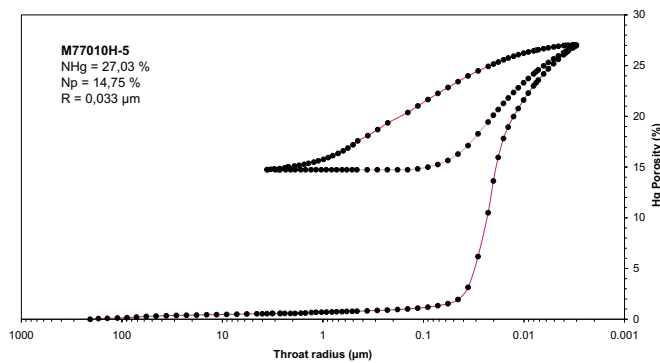

Supplement: Supplementary file 1 [file 1]
