# Supplementary material
Source: publisher figshare collection journal article supplement (https://geolsoc.figshare.com/articles/dataset/_/3454277)

# Mercury Porosimetry M730301H

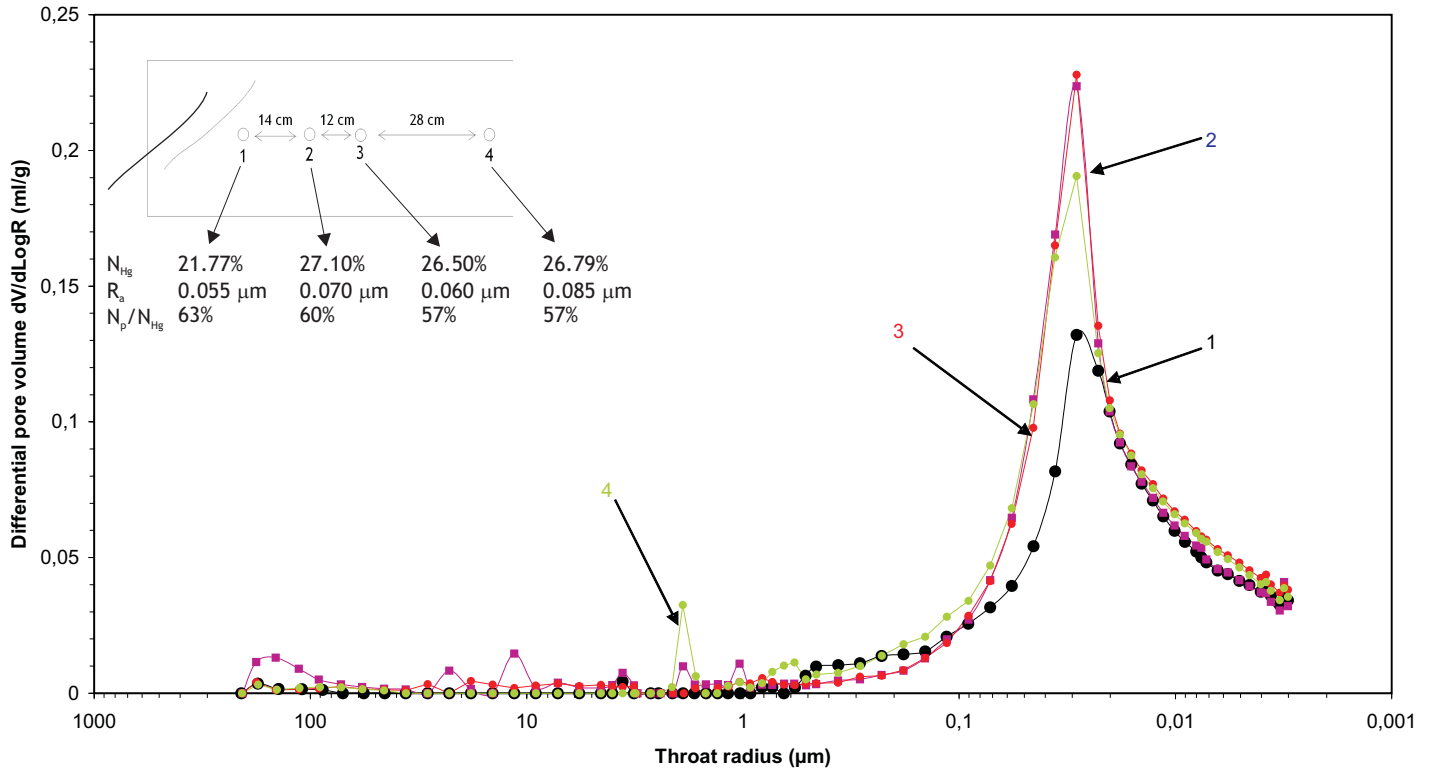

Mercury Porosimetry M730301H-1

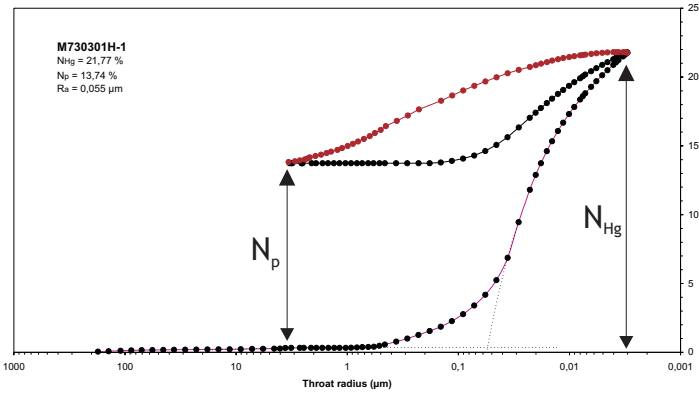

Mercury Porosimetry M730301H-2

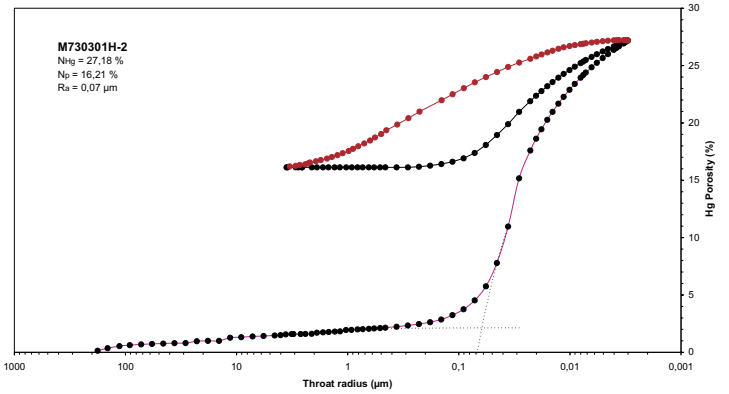

Mercury Porosimetry M730301H-3

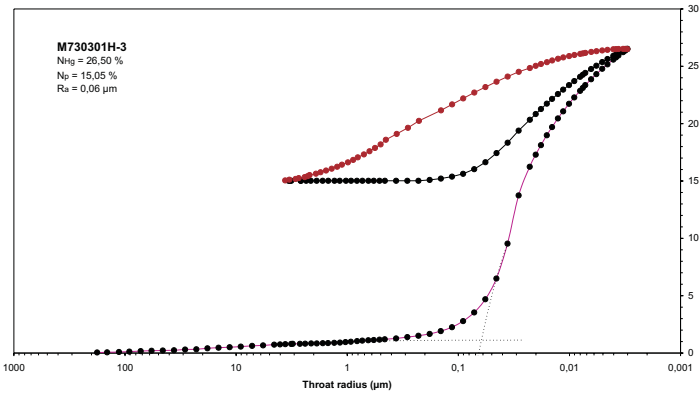

Mercury Porosimetry M730301H-4

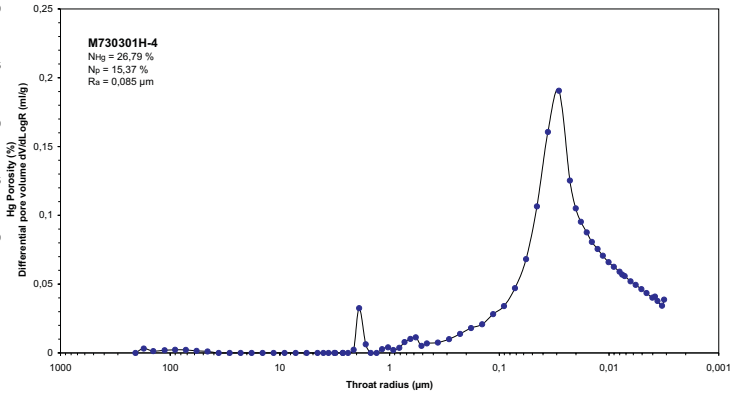

Supplement: Supplementary file 4 [file 1]
